# Supplementary material for: Modulating photoelectrochemical water splitting performance by constructing a type-II heterojunction between g-C3N4 and BiOI
Source: Royal Society of Chemistry journal article supplement (doi:10.1039/d0nj05384h), 2020-12-22
Supplement: d0nj05384h1.pdf [file d0nj05384h1.pdf]

## Supporting information

### **Modulating photoelectrochemical water splitting performance *via* the construction of Type-II heterojunction between g-C<sub>3</sub>N<sub>4</sub> and BiOI**

**S.Vinoth,<sup>a,b</sup> P. Mary Rajaitha,<sup>a</sup> and A. Pandikumar,<sup>a,b\*</sup>**

<sup>a</sup>Electro Organic and Materials Electrochemistry Division,  
CSIR-Central Electrochemical Research Institute,  
Karaikudi-630 003, Tamil Nadu, India.

<sup>b</sup>Academy of Scientific and Innovative Research (AcSIR), Ghaziabad- 201002, India

*\*Corresponding Author E-mail: pandikumarinbox@gmail.com  
pandikumar@cecri.res.in*

## 1. Experimental section

### 1.1. Chemicals and reagents

Chemicals such as melamine ( $\text{C}_3\text{H}_6\text{N}_6$  – Alfa Aesar), bismuth nitrate pentahydrate ( $\text{Bi}(\text{NO}_3)_3 \cdot 5\text{H}_2\text{O}$  - SRL), potassium iodide (KI - Merck), ammonium sulfate ( $(\text{NH}_4)_2\text{SO}_4$  - Fischer Scientific), and ethylene glycol ( $(\text{CH}_2\text{OH})_2$ - SRL), Nafion (Alfa Aesar) were purchased as analytical grade and used as received.

### 1.2. Characterization instruments

The diffuse reflectance spectra for the prepared hybrid materials were analyzed using  $\text{BaSO}_4$  as a reference in Cary 500 Scan UV–visible spectrophotometer equipped with a diffuse reflectance accessory. The FT-IR spectra were carried out using Bruker (Model: TENSOR 27), Germany Optik GmbH, Fourier-transform infrared spectrophotometer. The crystalline nature of the samples was analyzed using a Bruker AXS D8 Advance X-ray diffractometer with ( $\lambda = 1.54178 \text{ \AA}$ ) Cu  $K\alpha$  radiation. Photoluminescence spectra were recorded using a Perkin Elmer fluorescence spectrophotometer. The surface composition and oxidation state of the elements were investigated by ( $K\alpha$  -1253.6 eV) XPS with Mg as X-ray source (MULTILAB 2000, Thermo Scientific, X-ray Photoelectron Spectrometer). High-resolution transmission electron microscopic image and elemental mapping in high angle annular dark field in scanning TEM (HAADF - STEM) mode were carried out with FEI Tecnai F20 Super-Twin. The STEM and elemental mapping were performed in HAADF mode. A bath type ultrasonic cleaner with ultrasonic power and ultrasonic frequency of 100 W and 50 Hz, used for the sonication process for the synthesis of BiOI and g- $\text{C}_3\text{N}_4$ /BiOI hybrid material.

### 1.3. Photoelectrochemical studies

Photoelectrochemical experiments were carried out using a three-electrode system with an electrochemical workstation Autolab (ECO CHEMIE PGSTAT302 BV TYPE serial no.AUT72831) for LSV, CA analysis and Orignalys (OrigaMaster 5 software) used for EIS analysis. The ORIEL LCS-100 solar simulator (Newport, USA) with AM 1.5 AG (100 mW cm<sup>-2</sup>) filter was employed as a light source. The platinum wire and Ag/AgCl with saturated KCl were employed as counter electrode, reference electrodes, and the working electrode consist with fabricated materials on FTO (Fluorine doped Tin Oxide) glass.

A 50 mg of prepared material mixed in 500 µL of Nafion:ethanol (2:1 ratio) solution stirred for 18 h and 30 µL of the suspension coated on 1 cm<sup>2</sup> of FTO plate by drop-cast method. The photoelectrodes were calcinated at 450 °C for 1 h and cooled to room temperature.

The photocurrent response by linear sweep voltammetry, chronoamperometry, and electrochemical impedance spectroscopy (EIS) were performed at room temperature. The measured potentials from Ag/AgCl reference electrode could be converted to the reversible hydrogen electrode (RHE) using Eqn. (S1).

$$E_{\text{RHE}} = E_{\text{Ag/AgCl}} + 0.059 \text{ pH} + E^{\circ}_{\text{Ag/AgCl}} \quad \text{---- (1)}$$

Where,  $E_{\text{RHE}}$  = Potential at reversible hydrogen electrode,  $E_{\text{Ag/AgCl}}$  is the experimentally measured potential,  $E^{\circ}_{\text{Ag/AgCl}} = 0.1976 \text{ V}$  at 25° C, pH of the electrolyte 0.5 M (Na<sub>2</sub>SO<sub>3</sub> + NaHCO<sub>3</sub>).

### 1.4. Synthesis of g-C<sub>3</sub>N<sub>4</sub>

The g-C<sub>3</sub>N<sub>4</sub> synthesized by pyrolysis method in which, melamine and ammonium sulfate (1:1) was mixed and ground for an hour with mortar and pestle to get homogeneous mixture <sup>38</sup>.

The obtained mixture was transferred into alumina crucible and pyrolysis for 550 °C by 4 h at 2 °C/min.

### 1.5. Synthesis of g-C<sub>3</sub>N<sub>4</sub>/BiOI hybrid material

The g-C<sub>3</sub>N<sub>4</sub>/BiOI hybrid material was prepared by ultrasonically assisted hydrothermal synthesis as follow (Scheme 1). A desired amount of g-C<sub>3</sub>N<sub>4</sub> and 0.25 M of Bi(NO)<sub>3</sub>.5H<sub>2</sub>O were mixed with water under constant stirring for 15 min and it was dissolved in 20 mL EG by ultrasonication with 1 h (solution A). Meanwhile, 0.25 M of KI mixed in water and ethylene glycol and it was sonicated for 1 h. Then, it was poured into solution A with drop-wise under continuous stirring for 1 h to attain a homogenous solution. After that, a 80 mL of resultant solution was taken into a Teflon lined autoclave (stainless steel) and heated at 150 °C at 24 h. After reached the room temperature, the solution was centrifuged and washed with de-ionized water followed by ethanol and dried overnight at 60 °C. BiOI microspheres were synthesized with the similar procedure without the addition of g-C<sub>3</sub>N<sub>4</sub>.

### 1.6 Flat-band potential measurements

The flat-band potential could be calculated by the Poisson's equation:

$$\frac{1}{C^2} = \frac{2}{\varepsilon \varepsilon^0 A 2ND} \left( V - V_{fb} - \frac{k_b T}{e} \right) \quad \text{----- (2)}$$

Where, C, A, N<sub>D</sub>, V, T, k<sub>b</sub>, e, ε° and v<sub>fb</sub> represents the interfacial capacitance, area, number of donors, applied voltage, absolute temperature, Boltzmann's constant, electronic charge, permittivity of free space and flat band potential, respectively.

The charge transfer mechanism in g-C<sub>3</sub>N<sub>4</sub>/BiOI was proposed based on conduction band (CB) and valance band (VB) potential level of g-C<sub>3</sub>N<sub>4</sub> and BiOI using Eqn. (3) and (4)

$$E_{VB} = \chi - E^e + 0.5E_g \quad \text{---- (3)}$$

$$E_{CB} = E_{VB} - E_g \quad \text{---- (4)}$$

Where  $\chi$ ,  $E^e$ ,  $E_{CB}$ ,  $E_{VB}$ , and  $E_g$  represents the absolute Mulliken's electronegativity, free electrons energy in hydrogen scale (4.50 eV) calculated conduction band edge, valence band position and energy of band gap, respectively.

### Figures and captions

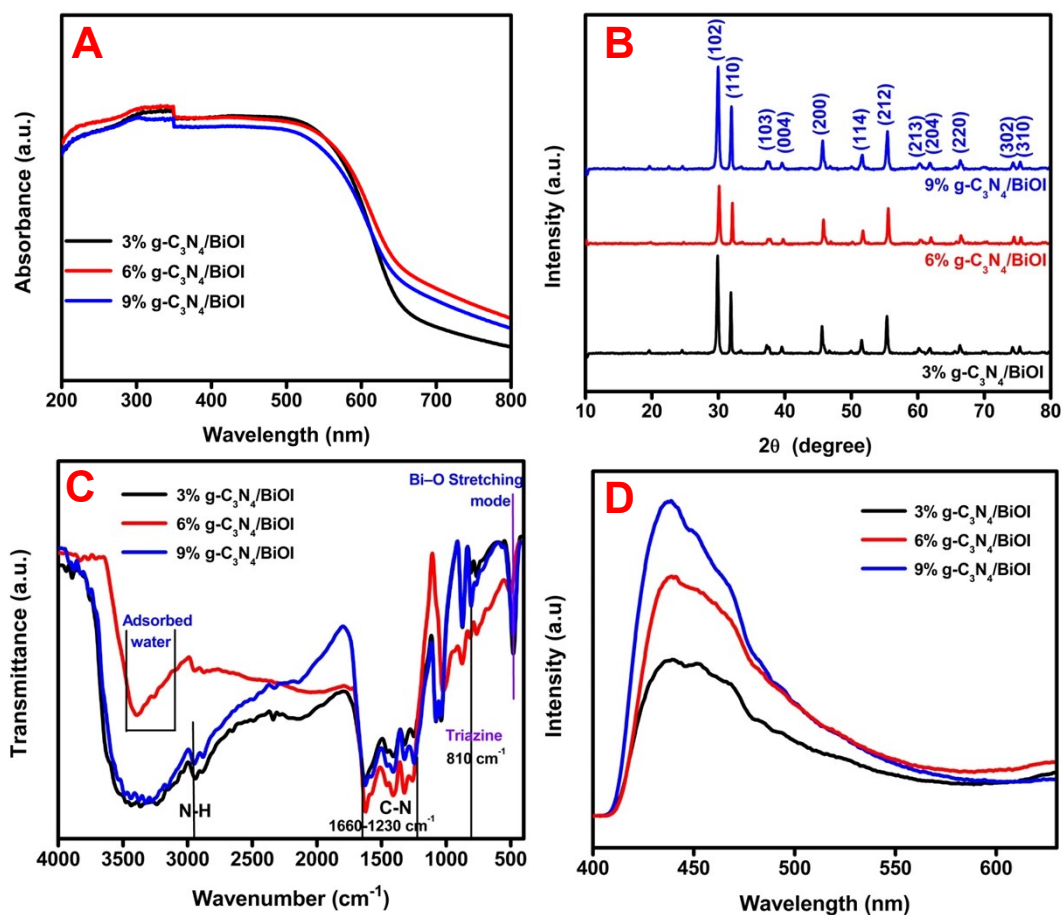

**Figure S1.** (A) DRS, (B) XRD pattern, (C) FT-IR and (D) PL spectra obtained for 3, 6 and 9% g-C<sub>3</sub>N<sub>4</sub>/BiOI hybrid materials

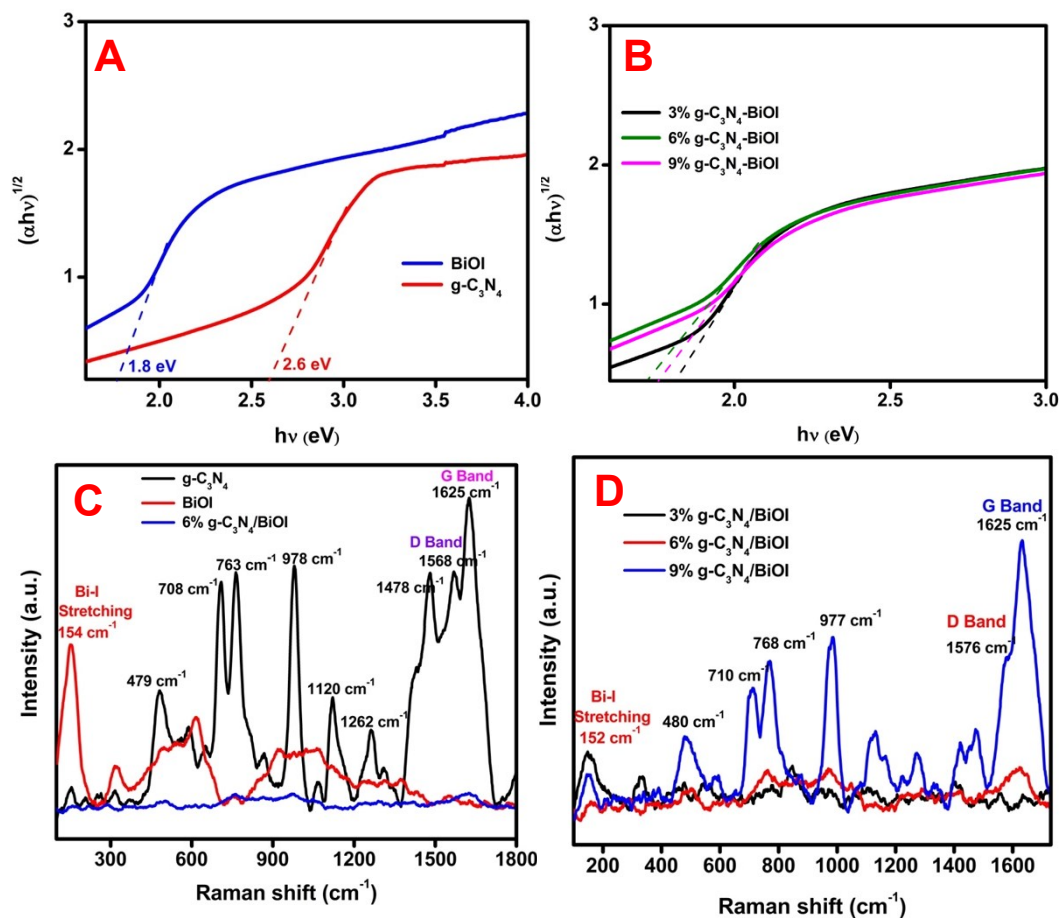

**Figure S2.** Tauc's plot obtained for (A) g-C<sub>3</sub>N<sub>4</sub>, BiOI and (B) 3, 6, 9% g-C<sub>3</sub>N<sub>4</sub>/BiOI hybrid materials, (C) Raman spectra obtained for g-C<sub>3</sub>N<sub>4</sub>, BiOI and 6% g-C<sub>3</sub>N<sub>4</sub>/BiOI hybrid and (D) Raman spectra obtained for 3, 6 and 9% g-C<sub>3</sub>N<sub>4</sub>/BiOI hybrid materials

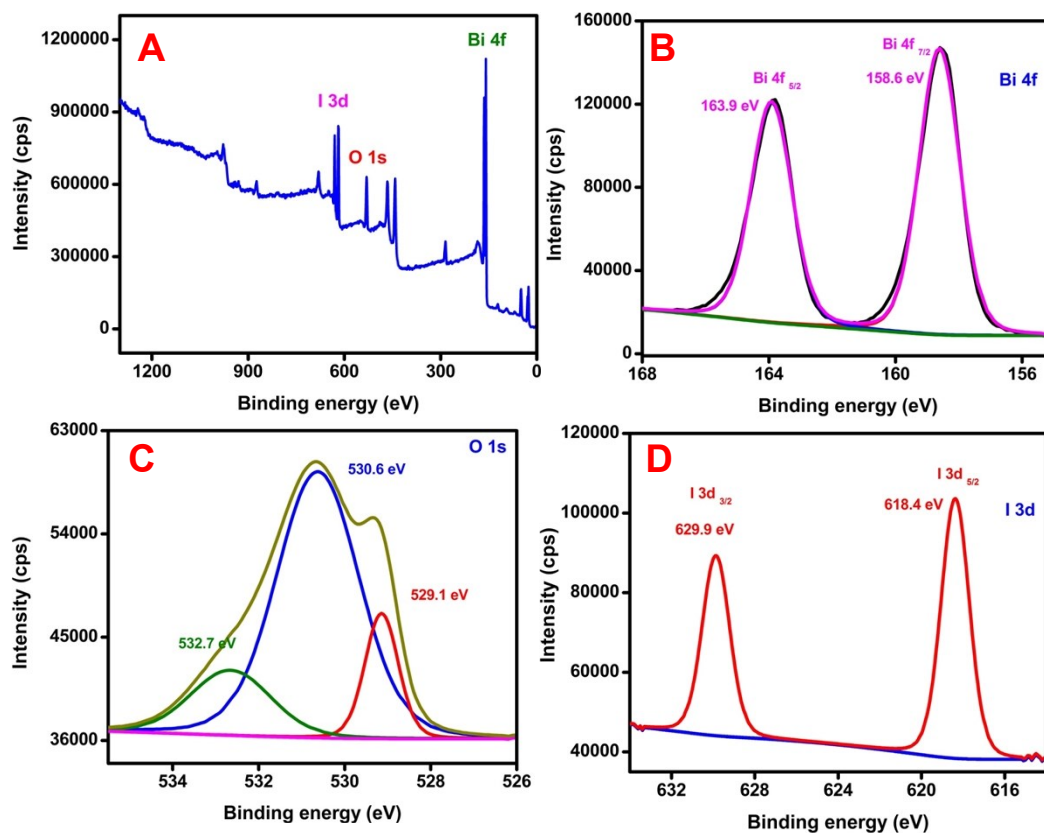

**Figure S3.** XPS spectra obtained for BiOI microspheres (A) Survey scan for BiOI, (B) Bi 4f, (C) O 1s and (D) I 3d core-level spectra.

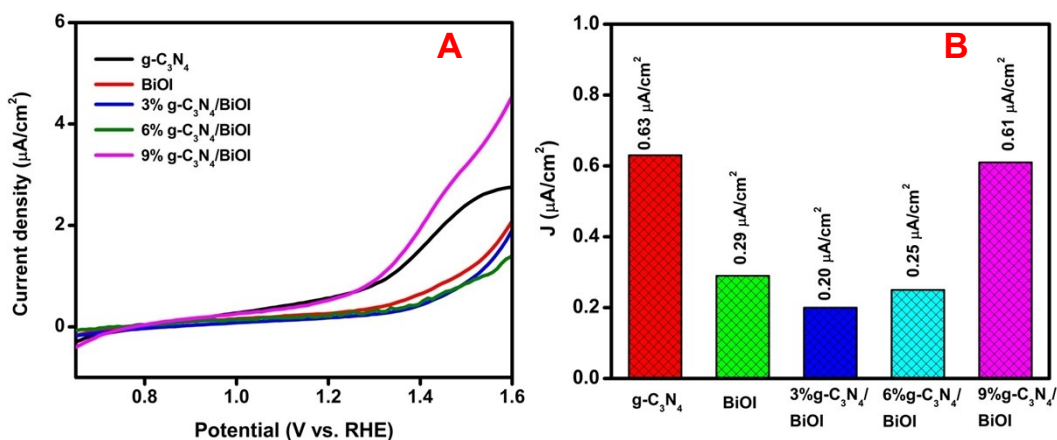

**Figure S4.** (A) Linear sweep voltammograms obtained for g-C<sub>3</sub>N<sub>4</sub>, BiOI, 3, 6 and 9% g-C<sub>3</sub>N<sub>4</sub>/BiOI under light illumination of  $100 \text{ mW cm}^{-2}$  (AM 1.5G) at a scan rate of  $10 \text{ mV s}^{-1}$  in  $0.5 \text{ M Na}_2\text{SO}_4$  and (B) Photocurrent density of different photoanode materials under light illumination of  $100 \text{ mW cm}^{-2}$  (AM 1.5 G) at a scan rate of  $10 \text{ mV s}^{-1}$  in  $0.5 \text{ M Na}_2\text{SO}_4$

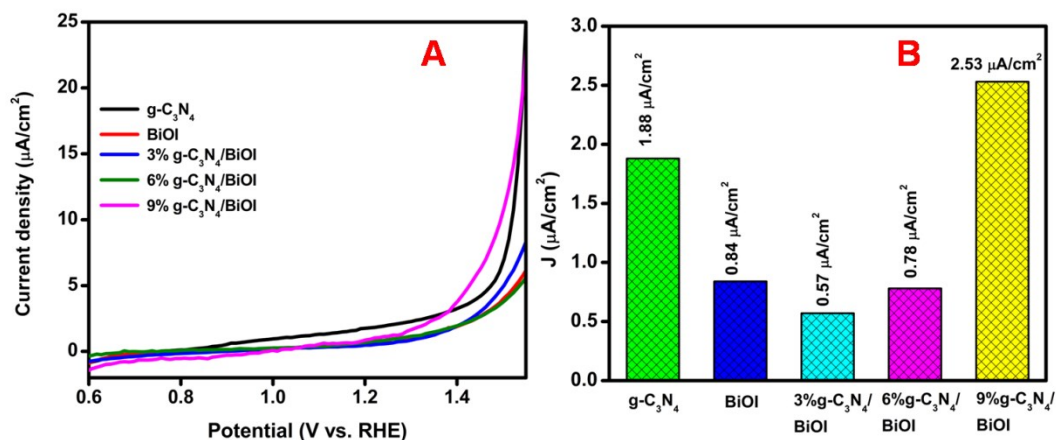

**Figure S5.** (A) Linear sweep voltammograms obtained for  $\text{g-C}_3\text{N}_4$ , BiOI, 3, 6 and 9%  $\text{g-C}_3\text{N}_4/\text{BiOI}$  under light illumination of  $100 \text{ mW cm}^{-2}$  (AM 1.5G) at a scan rate of  $10 \text{ mV s}^{-1}$  in 1 M KOH and (B) Photocurrent density of different photoanode materials under light illumination of  $100 \text{ mW cm}^{-2}$  (AM 1.5 G) at a scan rate of  $10 \text{ mV s}^{-1}$  in 1 M KOH

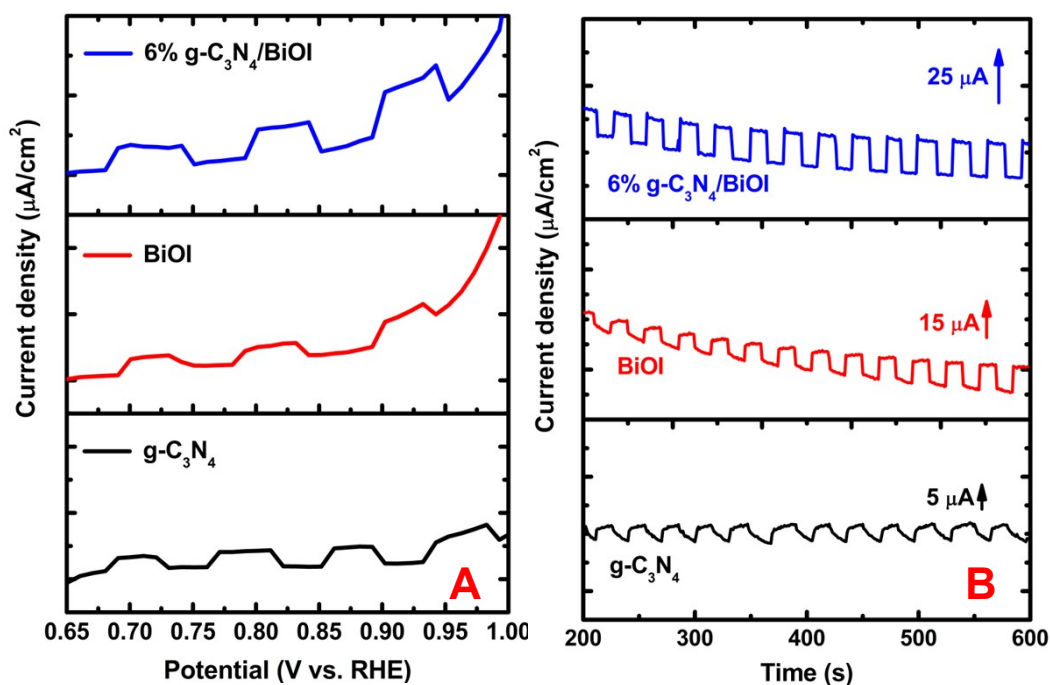

**Figure S6.** (A) Linear sweep voltammograms obtained for  $\text{g-C}_3\text{N}_4$ , BiOI, 6%  $\text{g-C}_3\text{N}_4/\text{BiOI}$  hybrid materials under the chopped condition and (B) Chronoamperometric  $J$ - $T$  curves obtained for  $\text{g-C}_3\text{N}_4$ , BiOI, 6%  $\text{g-C}_3\text{N}_4/\text{BiOI}$  hybrid materials at 1.23 V vs. RHE

**Table S1.** EIS Nyquist plot fitting parameters obtained for different photoanodes

| <b>Photoanode</b>                        | <b><math>R_s</math> (k<math>\Omega</math>)</b> | <b><math>R_{ct}</math> (k<math>\Omega</math>)</b> |
|------------------------------------------|------------------------------------------------|---------------------------------------------------|
| g-C <sub>3</sub> N <sub>4</sub>          | 0.045                                          | 22.2                                              |
| BiOI                                     | 0.051                                          | 37.2                                              |
| 6% g-C <sub>3</sub> N <sub>4</sub> /BiOI | 0.038                                          | 18.7                                              |
